# Supplementary material for: Heat wave characteristics: evaluation of regional climate model performances for Germany
Source: Copernicus journal article supplement (doi:10.5194/nhess-2023-91), 2023-06-19
Supplement: Supplementary file [file nhess-2023-91-AC2-supplement.pdf]

## **Response to RC2 on nhe5s-2023-91**

NOTE: Reviewer's comments are in black, our responses to the comments are given in blue below. Since we also address points in the body text here, we have highlighted the relevant text passages in bold for a better overview.

Petrovic et al. present an evaluation study of a set of reanalysis-driven regional climate model simulations with respect to the representation of heat wave characteristics over Germany. The authors employ simulated (EURO-CORDEX evaluation runs and two special WRF experiments) and observed (EOBS) daily maximum temperature in the period 1980-2099 and evaluate the model performance for several heat wave statistics (mean max. temperature, number of heat waves, heat wave duration, heat wave intensity). They find no clear benefit of the increase resolution in one of the WRF experiments and, in general, a mixed picture with no clear best or worse performing model. All models tend to underestimate the observed increase in the spatial extent of heat waves.

The manuscript is nicely written and contains a very good literature review and very appropriately outline the motivation for their study. The authors put great effort into documenting the model performances.

**However, I do not think that the manuscript is suited for publication in the journal as its novelty and its significance for a wider audience is very limited.**

As highlighted by both reviewers, heat waves (along with droughts) are a highly relevant topic for the general audience and also for the (high-resolution) modeling community. Both audiences are approached by this comprehensive evaluation. It provides a source of information for users of the model outputs, especially for those who work in a heat wave context. The manuscript reveals limitations of models to appropriately simulate past heat waves with associated characteristics. This also comes with implications for studies dealing with future projections as it shows that multi-model ensemble approaches are necessary. Furthermore, the study could guide in which models rather to use or not use for similar contexts, especially if only a limited number or set of models can be used. As for the novelty, we stress that a comparable study has not been performed yet for this region. Neither is there a study that addresses the two questions of model's resolution and settings influence on the heat wave reproduction that employs very high resolution (5 km) model outputs.

Generally, we would like to emphasize the fact that this study is a follow-up on the drought study published last year, also in NHESS within the same special issue. This common context needs to be considered, since droughts and heat waves are often regarded together. In the drought study key findings were among others that resolution and especially model settings do matter for certain aspects like trends and that all models performed on a similar level regarding the domain mean conditions for the characteristics. We wanted to investigate these questions also for heat waves by using the exact same data sets and applying the same or similar methods and draw conclusions about similarities and differences for these two types of extreme events. We were able to determine decisive differences especially regarding the role of resolution and model settings as well as the performance for the respective characteristics. For the heat waves there are considerable differences between the single model performances regarding the characteristics.

The paper has the flavour of a rather technical documentation of model performance and remains very descriptive. **Reasons for a good or bad reproduction of heat wave characteristics (large scale flow conditions, surface atmosphere interactions etc.) are discussed but actually not investigated.**

We agree that some investigation about potential reasons for the spread in the model performances would be useful. To address this, we will analyze additional variables like surface heat fluxes, soil moisture, radiation and sea level pressure and check the differences among the models and draw connections to the Tmax simulations. We will try to keep this short as we see the problem, that the manuscript may become too long. However, even if the manuscript is mainly descriptive, we still see a value in this. As mentioned above, this could guide in model selection for studies to be conducted in a similar context.

**The employed model ensemble is not special or up-to-date (though not yet outdated) and concerning the EURO-CORDEX sub-ensemble has been validated extensively in previous works.**

There was no claim that the employed model ensemble is some sort of special. The reason how this ensemble came about is that at the time of selection, back before the related drought study, only in the selected outputs were the required variables available for the required time period. After the drought study, we wanted to assess exactly the same model outputs regarding their ability to reproduce heat waves to work out commonalities, but above all differences. Regarding the validation of the ensemble in previous works, we are not aware that this was done in a heat wave context especially for the same study region. We want to stress that this goes beyond just validating the reproduction of a single variable like Tmean or Tmax, which may have been done in the literature. But analyzing heat wave reproduction is not only about the actual variable values but about the distributions and variability of values.

**Most recent experiments, for instance, employ the newer ERA5 reanalysis as boundary forcing.**

This is correct, as noted, for the most recent simulations. The time of model selection was a while ago. Back then, ERA-Interim driven outputs were much more frequent. In fact, even today there are mainly ERA-Interim driven reanalysis outputs available at the EURO-CORDEX platform. However, the decisive factor here is that the WRF experiments also obtained their boundary conditions by ERA-Interim. A comparison with EURO-CORDEX outputs appears to be only useful if the boundary forcing is the same for all model outputs, since this allows to draw conclusions about the core model performances.

**The resolution analysis is restricted to the WRF model and hence very limited, and the evaluation is carried out at the coarser 12 km resolution (i.e., the 5 km experiment cannot profit from its potentially finer-scale heat wave patterns in the evaluation).**

Correct, the resolution analysis is restricted to the WRF model. The very high resolution (5 km) of this experiment needs to be considered here. We did not have any other model outputs available in that high resolution. It also needs to be considered that usually in model grid resolution related studies the resolution of the EURO-CORDEX RCMs (12.5 km) is often among the highest in the literature. True, we chose to interpolate to the coarser grid, since it is common practice to regrid from the finer to the coarser grid. It would be unfair otherwise. That does not necessarily mean that all benefits of higher resolution are degraded. As shown in our drought paper, higher resolution benefits are still there. We rather conclude that the benefits of higher resolution in this context are not that pronounced.

**Moreover, most evaluated metrics actually neglect the mean bias (since evaluation is carried out with respect to the simulated 90th percentile or even as a normalized bias in the Taylor diagrams).**

The true mean bias values are given in Table 1 in the manuscript. Moreover, it is explicitly mentioned that “a connection between the Tmax bias (Table 1) and the overall performance does not seem to exist, since COSMO-CLM has the lowest mean bias value (-0.16 °C), but the worst overall

performance, while on the other hand RCA4, which holds the highest mean bias value (-2.40 °C), does not show a significant bad performance". It is also described that the respective 90<sup>th</sup> percentiles were calculated for each model output individually in order to "circumvent the Tmax biases among the different models".

That is why I believe that there is not much to learn from the paper. There are also number of minor issues listed below. My suggestion is hence to reject the submission for the time being, but to encourage the authors to produce a more up-to-date and process-based evaluation of heat wave characteristics instead. The topic is certainly highly relevant.

With kind regards

Naturally, we would consider this differently. Our study connects the findings of the drought analysis with this analysis of heat waves. While it has been astonishing that there is such a large spread between models to reproduce droughts, it is an important message that the regional models have considerable issues in resembling heat waves. We agree with the reviewer that the manuscript can be improved with respect to a more process-based analysis. However, switching to a completely new analysis of ERA-5 driven regional models would be out of scope of the current time-frame and funding constraints.

Minor issues:

- The issue of internal variability in different model domain sizes is not discussed at all (relating especially to the 2003 event, i.e. to a singular event). The domains of the WRF experiments are unclear and not shown.

We can see the point here and will add some discussion about the role of internal variability.

Correct, the domains of the WRF experiments are not shown. They can be found in the given reference Warscher et al. (2019), which is openly accessible under this link: <https://www.mdpi.com/2073-4433/10/11/682>.

- WRF@5km has been interpolated to the EUR-11 grid, i.e. the resolution has been degraded and any potential benefit in a better representation of finer-scale spatial heat wave patterns is not visible. Also, bilinear interpolation should be avoided when interpolating from a finer to a coarser grid (only a fraction of the high resolution grid cells is employed in this kind of interpolation). Better use a conservative remapping.

Regarding the interpolation from the 5 km to the 12.5 km grid, please see the comment above.

For similar cases where temperature data needs to be regridded from a finer to a coarser scale, bilinear interpolation appears to be common practice, e.g., in Vautard et al. (2013), Wang et al. (2019ab), Varela et al. (2020) and Machard et al. (2022) from the manuscript's bibliography. In contrast to precipitation, temperature is not a discontinuous variable, hence there is no mass that needs to be preserved. Oftentimes the interpolation method is not even mentioned, assuming that bilinear interpolation is even used more often. Further confirmation can for example be found on this NCAR info page: <https://climatedataguide.ucar.edu/climate-tools/regridding-overview>. Due to these reasons we would like to stick to the interpolation method currently applied.

- Taylor diagram: You have to consider that the RMSE shown by the green lines is the CENTERED RMSE, i.e. any mean bias is implicitly corrected for. This should at least be mentioned, or even shown

for instance by different sizes of the symbols (according to their mean bias). Also compare to Table 1 where the mean bias is shown.

Correct, it is the centered RMSE and this will be added to the text. We will also make connections to the values in Table 1.

- Figure 2: The shadings are hardly distinguishable from each other. It would be much better to show a simple curve for each model instead of a shaded curve.

We agree. We will work on the visibility of this figure.

- Chapter 4.2 and further: You often speak of a “cold” or “warm” bias here. I would strongly recommend to avoid this, as all statistics are related to the 90th percentile of each individual simulation. Any mean bias of the 90th percentile is implicitly subtracted and what you’re looking at is actually the variability (temporal and in terms of magnitude) of all values above the simulated (or observed) 90th percentile.

We agree. We will replace “cold” and “warm” by “negative” and “positive”, respectively.

- I suggest to speak of “WRF simulations” or “WRF experiments” instead of “WRF domains”.

We agree. We will use the suggestions in the appropriate places in the text.

- Analysis of heat wave trends: You should definitely include a validation of Tmax (and its 90th percentile) in order to explain deficiencies in simulating heat wave trends.

We agree that this could be useful. We will add the grid cell based Tmax values averaged over the whole study period. Displaying the 90<sup>th</sup> percentile is considered difficult since it depends on the calendar day.
